# Supplementary material for: Histone acetyltransferase-deficient p300 mutants in diffuse large B cell lymphoma have altered transcriptional regulatory activities and are required for optimal cell growth
Source: PubMed Central journal article supplement (PMC3930761; doi:10.1186/1476-4598-13-29), 2014-02-15
Supplement: 1476-4598-13-29-S3.pdf [file 1476-4598-13-29-S3.pdf]

**Additional File 3 Fraction of acetylated lysine residue relative to total acetylated plus unmodified residue** Fraction of acetylated lysine residue relative to total acetylated plus unmodified residue  
 Fraction of acetylated lysine residue as determined by mass spectrometry for B-lymphoma cell lines. Values are plotted in Figure 5.

| Cell line        | Ratio of acetylated to acetylated plus unmodified peptides |        |        |        |        |        |
|------------------|------------------------------------------------------------|--------|--------|--------|--------|--------|
|                  | K9                                                         | K14    | K18    | K23    | K56    | K64    |
| <b>BJAB</b>      | 0.0004                                                     | 0.1800 | 0.0273 | 0.1883 | 0.0000 | 0.0000 |
| <b>Farage</b>    | 0.0038                                                     | 0.2819 | 0.0333 | 0.1693 | 0.0012 | 0.0000 |
| <b>Karpas422</b> | 0.0024                                                     | 0.0027 | 0.0035 | 0.1922 | 0.0001 | 0.0000 |
| <b>Pfeiffer</b>  | 0.0071                                                     | 0.0175 | 0.0175 | 0.2020 | 0.0369 | 0.0000 |
| <b>Ramos</b>     | 0.0042                                                     | 0.4967 | 0.0215 | 0.2148 | 0.0001 | 0.0000 |
| <b>RC-K8</b>     | 0.0001                                                     | 0.1507 | 0.0057 | 0.2417 | 0.0000 | 0.0000 |
| <b>SUDHL2</b>    | 0.0124                                                     | 0.0214 | 0.0265 | 0.2596 | 0.0001 | 0.0000 |
| <b>SUDHL6</b>    | 0.0124                                                     | 0.3977 | 0.0305 | 0.0061 | 0.0000 | 0.0000 |
| <b>SUDHL8</b>    | 0.0035                                                     | 0.1372 | 0.0515 | 0.1663 | 0.0001 | 0.0000 |
